# Supplementary material for: Rational design of a comprehensive cancer therapy platform using temperature-sensitive polymer grafted hollow gold nanospheres: simultaneous chemo/photothermal/photodynamic therapy triggered by a 650 nm laser with enhanced anti-tumor efficacy
Source: Royal Society of Chemistry journal article supplement (doi:10.1039/c5nr08253f), 2016-01-01
Supplement: c5nr08253f1.pdf [file c5nr08253f1.pdf]

## Electronic Supplementary Information

### **Rational Design of a Comprehensive Cancer Therapy Platform Using Temperature-Sensitive Polymer Grafted Hollow Gold Nanospheres: Simultaneous Chemo / Photothermal / Photodynamic Therapy Triggered by a 650 nm Laser with Enhanced Anti-Tumor Efficacy**

*Xiaoran Deng,<sup>a,c</sup> Yinyin Chen,<sup>a,c</sup> Ziyong Cheng,<sup>a,\*</sup> Kerong Deng,<sup>a,c</sup> Ping'an Ma,<sup>a</sup>*

*Zhiyao Hou,<sup>a,\*</sup> Bei Liu,<sup>a,c</sup> Shanshan Huang,<sup>a</sup> Dayong Jin<sup>b</sup> and Jun Lin<sup>a,\*</sup>*

a State Key Laboratory of Rare Earth Resource Utilization, Changchun Institute of Applied Chemistry, Chinese Academy of Sciences, Changchun 130021, P. R. China;

b Institute for Biomedical Materials and Devices, Faculty of Science, University of Technology Sydney, NSW, 2007, Australia;

c University of Chinese Academy of Sciences, Beijing, 100049, China.

E-mail address: [jlin@ciac.ac.cn](mailto:jlin@ciac.ac.cn); [zycheng@ciac.ac.cn](mailto:zycheng@ciac.ac.cn); [zyhou@ciac.ac.cn](mailto:zyhou@ciac.ac.cn)

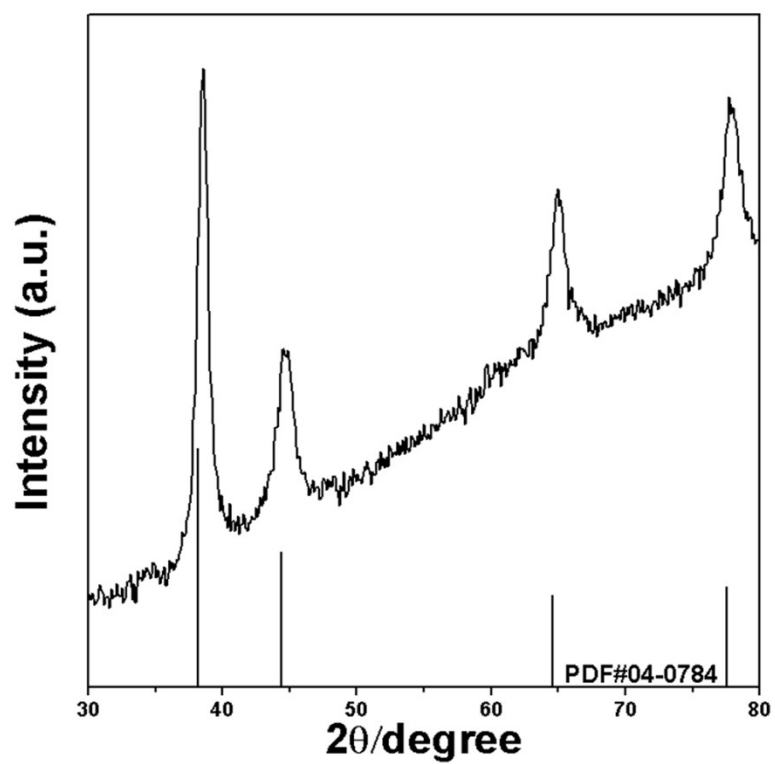

**Fig. S1.** Wide-angle XRD patterns of as-made HAuNs and the standard JCPDS card 04-0784 of Au.

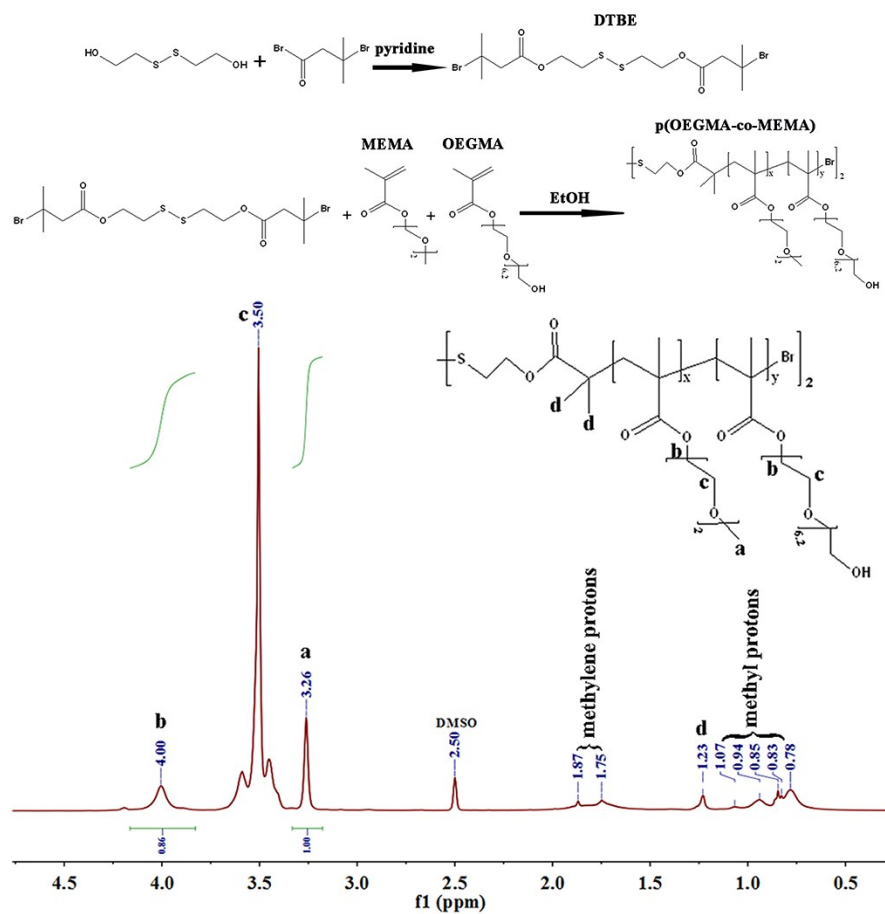

**Fig. S2.** The chemical reacting equations and  $^1\text{H-NMR}$  spectra of temperature-sensitive polymer p(OEGMA-co-MEMA).

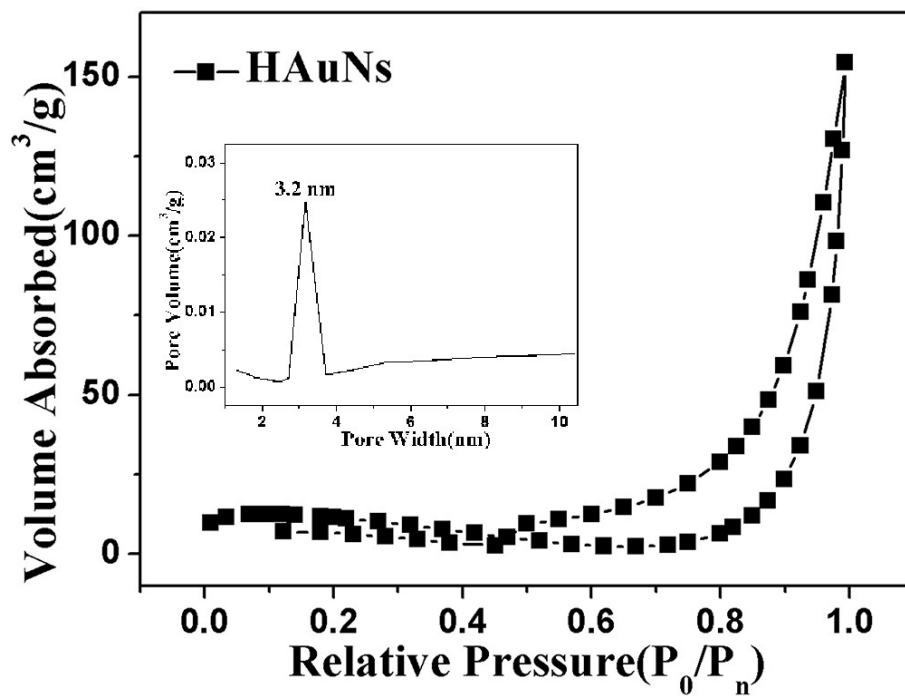

Fig. S3 N<sub>2</sub> adsorption/desorption isotherm and pore width (insert) of the HAuNs.

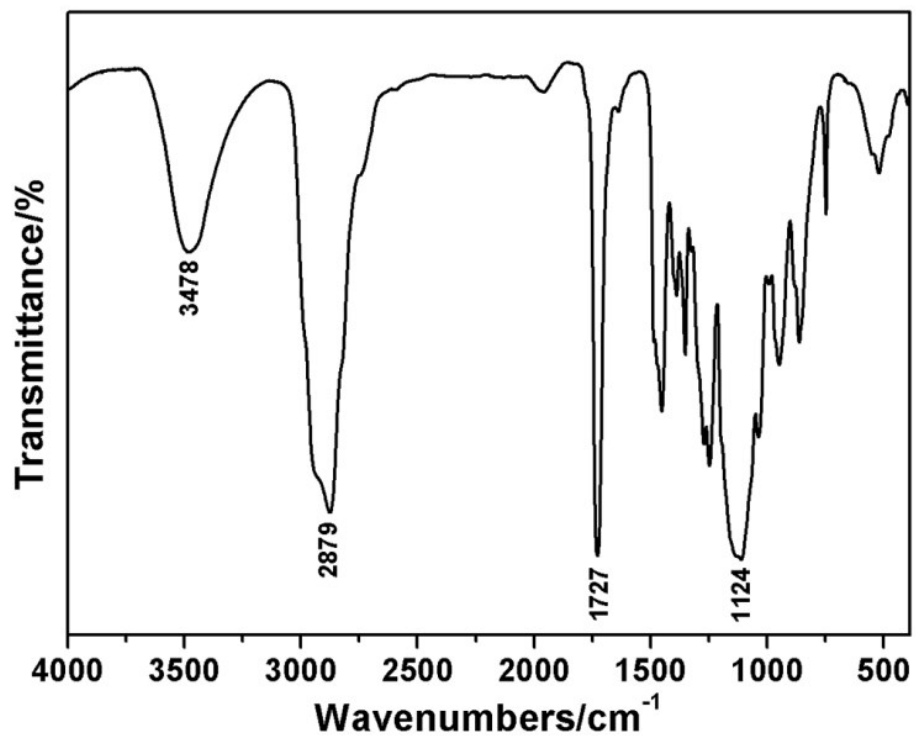

**Fig. S4** FT-IR spectra of temperature-sensitive polymer p(OEGMA-co-MEMA).

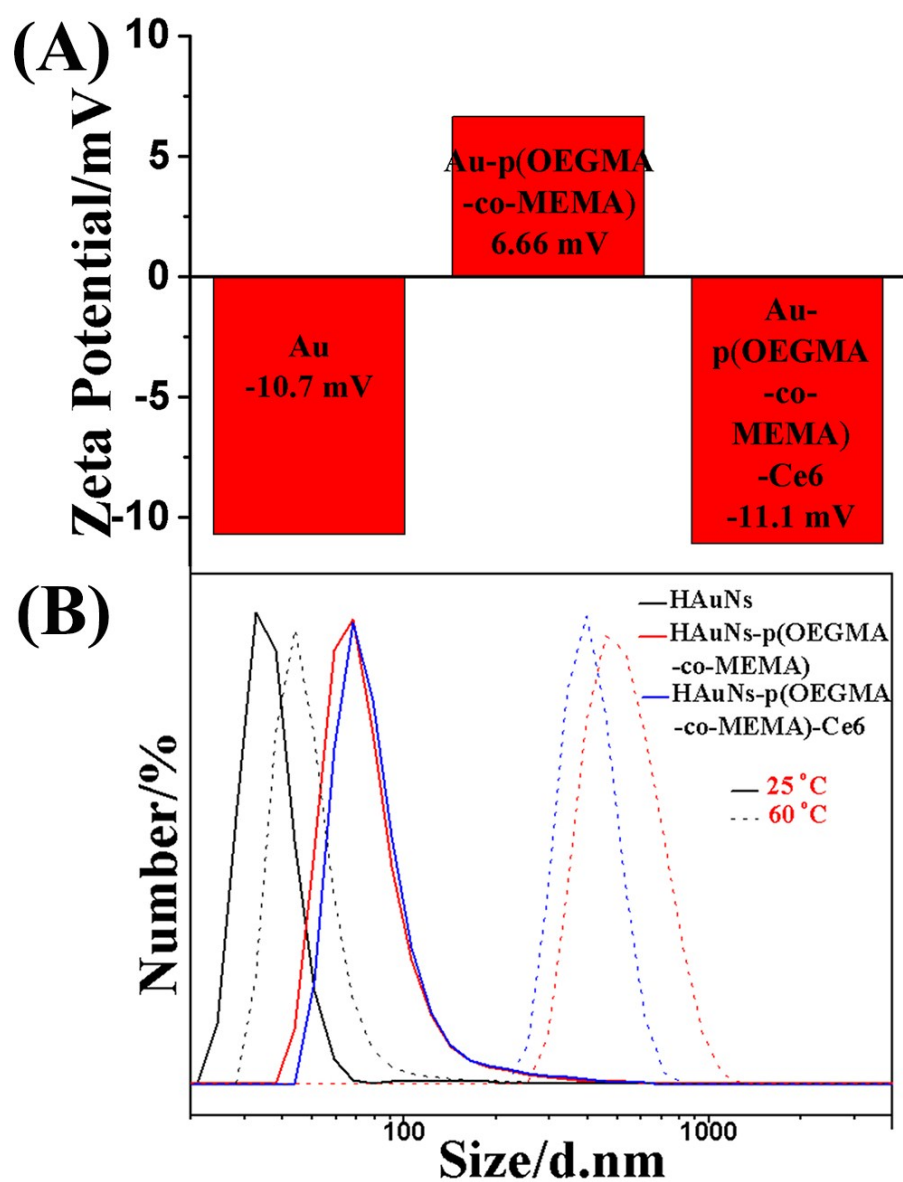

**Fig. S5** The zeta potential and hydrodynamic diameter of HAuNS, HAuNSs-p(OEOMA-co-MEMA) and HAuNSs-p(OEOMA-co-MEMA)-Ce6 nanocomposite at different temperature.

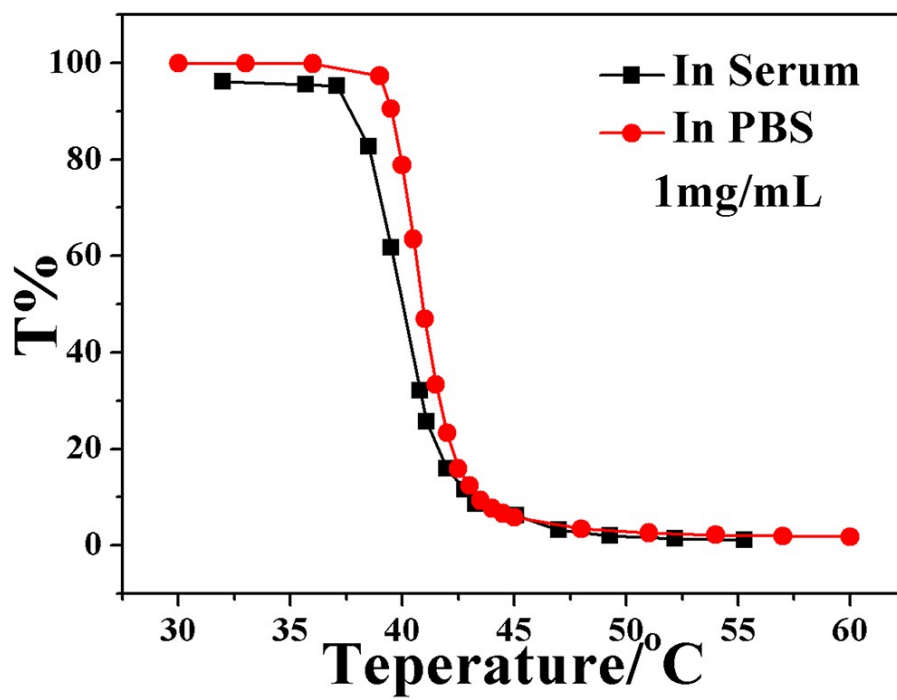

**Fig. S6** The curve of light transmittance of p(OEGMA-co-MEMA) in PBS solution and serum with different temperature.

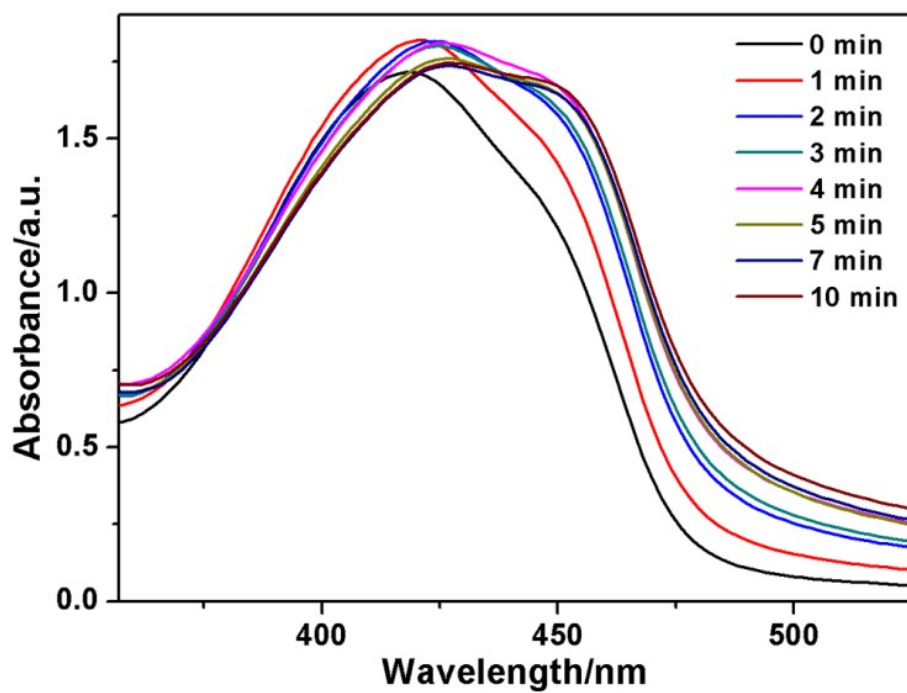

**Fig. S7** Absorbance changes of DPBF treated with 650 nm laser irradiation for different times.



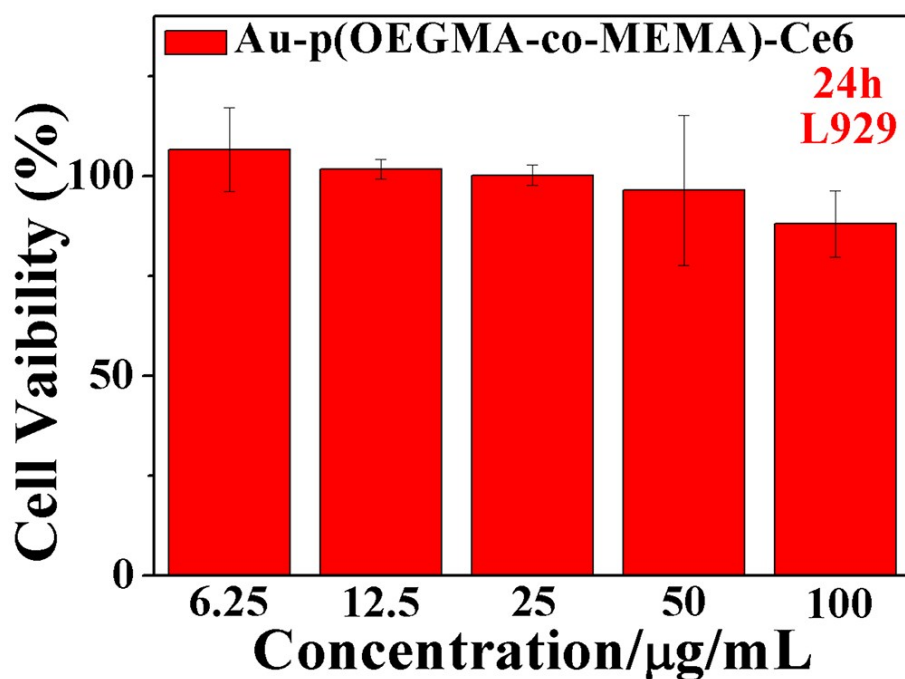

**Fig. S8** *In vitro* L929 cells' relative viabilities after incubation for 24 h with HAuNs-p(OEGOMA-co-MEMA)-Ce6-DOX nanocomposites at different concentrations at 37 oC and pH=7.4. The nanocomposites concentrations were 62.5, 125, 250, 500, 1000 µg/mL, respectively. Error bars indicate standard deviations, N = 4.

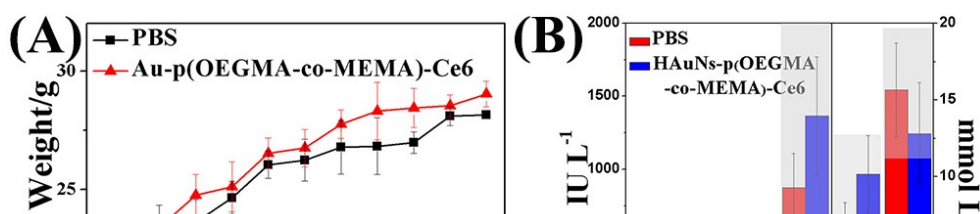

**Fig. S9** *In vivo* change in body weight (A) achieved from normal mice after twice intravenously injection with PBS and HAuNs-p(OEGMA-co-MEMA)-Ce6 nanocomposites at day 1 and 7. Blood analysis data for mice (B) and hematoxylin and eosin (H&E) stained images of major organs of mice (C) 21 days after two doses intravenously injection with PBS and HAuNs-p(OEGMA-co-MEMA)-Ce6 nanocomposites. And the gray area is the normal range.

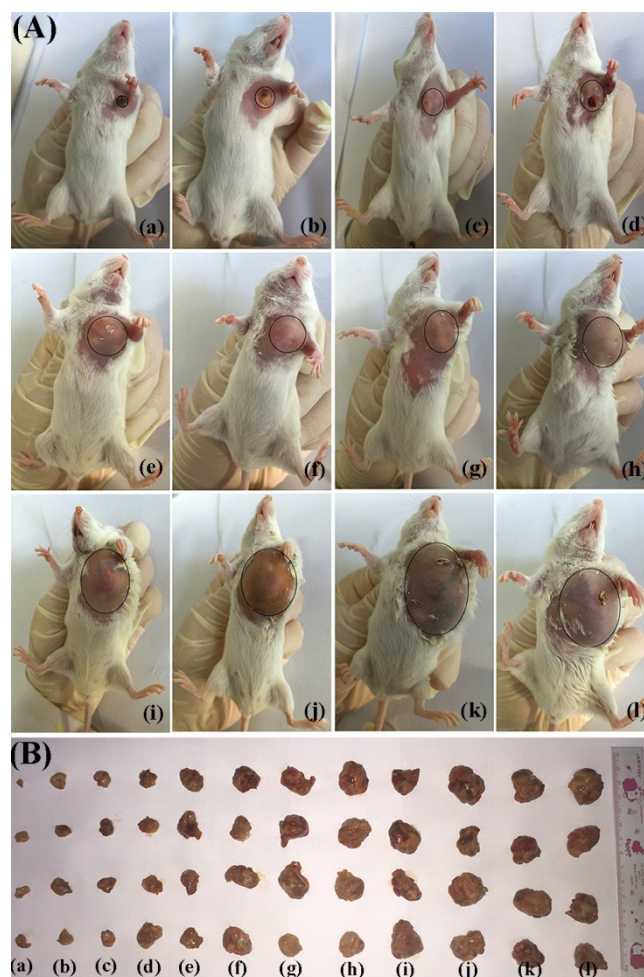

**Fig. S10** Photographs of mice bearing tumor (A) and excised tumors from euthanized representative mice (B) (the photographs a-l are the groups HAuNs-p(OEOMA-co-MEMA)-Ce6-DOX (a), HAuNs-p(OEOMA-co-MEMA)-Ce6 (b), HAuNs-p(OEGMA-co-MEMA)-DOX (c), free DOX (d), HAuNs-p(OEGMA-co-MEMA) (e), free Ce6 (f) and blank group (l) with laser irradiation and HAuNs-p(OEGMA-co-MEMA)-Ce6-DOX (g), HAuNs-p(OEGMA-co-MEMA)-DOX (h), HAuNs-p(OEGMA-co-MEMA)-Ce6 (i), HAuNs-p(OEGMA-co-MEMA) (j), free Ce6 (k) without laser irradiation).

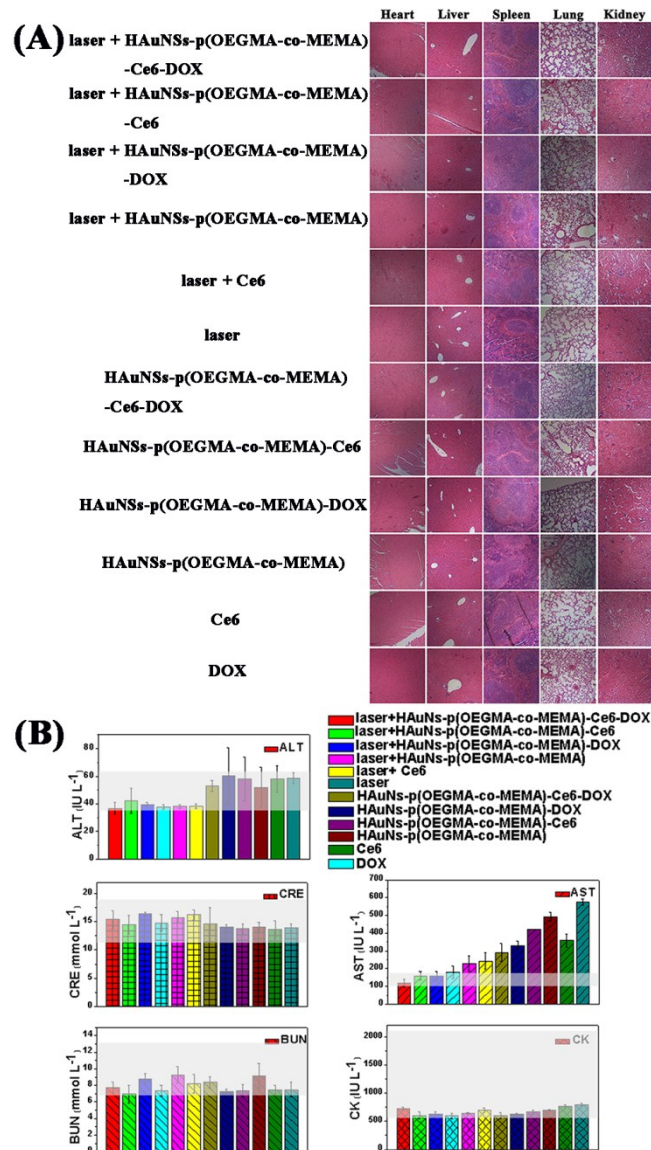

**Fig. S11** Hematoxylin and eosin (H&E) stained images of major organs of mice 13 days after two doses injection in situ (A) and blood analysis data for mice (B) treated with HAuNSs-p(OEGMA-co-MEMA)-Ce6-DOX, HAuNSs-p(OEGMA-co-MEMA)-Ce6, HAuNSs-p(OEGMA-co-MEMA)-DOX, HAuNSs-p(OEGMA-co-MEMA), free Ce6, free DOX with and without laser irradiation. And the gray area is the normal range.
